# Supplementary material for: Geological Significance of Neoproterozoic Intrusive Rocks in the South Section of the Ailaoshan Orogenic Belt, SW China: Insights from Petrology, Geochemistry, and Geochronology
Source: MDPI journal article supplement (doi:10.3390/min13030349), 2023-03-01
Supplement: s1 [file s1]

Table S3 LA-ICP-MS Lu-Hf analysis results of the magmatic rock zircons

| Sample No. | Age (Ma) | $^{176}\text{Yb}/^{177}\text{Hf}$ | $^{176}\text{Lu}/^{177}\text{Hf}$ | $^{176}\text{Hf}/^{177}\text{Hf}$ | $\varepsilon_{\text{Hf}}(0)$ | $\varepsilon_{\text{Hf}}(t)$ | $T_{\text{DM}}$ (Ma) | $T_{\text{DM}}^{\text{C}}$ (Ma) | $f_{\text{Lu/Hf}}$ |
|------------|----------|-----------------------------------|-----------------------------------|-----------------------------------|------------------------------|------------------------------|----------------------|---------------------------------|--------------------|
| DP-141-1   | 815      | 0.025122                          | 0.000867                          | 0.282247                          | -18.58                       | -1.07                        | 1414.51              | 2174.72                         | -0.97              |
| DP-141-2   | 813      | 0.032683                          | 0.001113                          | 0.282175                          | -21.11                       | -3.8                         | 1524.09              | 2415.66                         | -0.97              |
| DP-141-3   | 814      | 0.016622                          | 0.000574                          | 0.282344                          | -15.13                       | 2.52                         | 1269.08              | 1854.06                         | -0.98              |
| DP-141-4   | 817      | 0.038887                          | 0.001353                          | 0.282283                          | -17.28                       | 0.02                         | 1380.98              | 2079.24                         | -0.96              |
| DP-141-5   | 815      | 0.025639                          | 0.000866                          | 0.282216                          | -19.65                       | -2.15                        | 1456.83              | 2271.03                         | -0.97              |
| DP-141-6   | 817      | 0.032357                          | 0.001273                          | 0.282307                          | -16.45                       | 0.9                          | 1344.93              | 2000.7                          | -0.96              |
| DP-141-7   | 814      | 0.020715                          | 0.000752                          | 0.282214                          | -19.72                       | -2.17                        | 1454.87              | 2271.81                         | -0.98              |
| DP-141-8   | 819      | 0.01984                           | 0.000726                          | 0.282255                          | -18.28                       | -0.61                        | 1397.67              | 2136.4                          | -0.98              |
| DP-141-9   | 817      | 0.039905                          | 0.001455                          | 0.282409                          | -12.84                       | 4.4                          | 1207.07              | 1687.7                          | -0.96              |
| DP-141-10  | 817      | 0.015492                          | 0.000636                          | 0.282281                          | -17.37                       | 0.3                          | 1358.86              | 2053.73                         | -0.98              |
| DP-141-11  | 815      | 0.022939                          | 0.000919                          | 0.282393                          | -13.42                       | 4.08                         | 1212.75              | 1715.48                         | -0.97              |
| DP-141-12  | 817      | 0.037579                          | 0.001455                          | 0.28244                           | -11.76                       | 5.49                         | 1163.47              | 1590.21                         | -0.96              |
| DP-141-13  | 814      | 0.04223                           | 0.001614                          | 0.282078                          | -24.55                       | -7.48                        | 1681.76              | 2743.23                         | -0.95              |
| DP-141-14  | 815      | 0.015181                          | 0.000612                          | 0.282382                          | -13.79                       | 3.86                         | 1217.75              | 1734.55                         | -0.98              |
| DP-141-15  | 818      | 0.0248                            | 0.000961                          | 0.282289                          | -17.1                        | 0.42                         | 1359.58              | 2043.73                         | -0.97              |
| DP205-01   | 787      | 0.034523                          | 0.001243                          | 0.282284                          | -17.3                        | -0.5                         | 1376                 | 2109                            | -0.96              |
| DP205-02   | 793      | 0.039493                          | 0.001631                          | 0.282238                          | -18.9                        | -2.3                         | 1456                 | 2266                            | -0.95              |
| DP205-03   | 744      | 0.029166                          | 0.00117                           | 0.282204                          | -20.1                        | -4.3                         | 1486                 | 2413                            | -0.96              |
| DP205-04   | 754      | 0.052121                          | 0.002067                          | 0.282262                          | -18                          | -2.5                         | 1439                 | 2257                            | -0.94              |
| DP205-05   | 718      | 0.044345                          | 0.001876                          | 0.282307                          | -16.4                        | -1.5                         | 1367                 | 2150                            | -0.94              |
| DP205-06   | 727      | 0.041901                          | 0.001706                          | 0.282247                          | -18.6                        | -3.4                         | 1447                 | 2323                            | -0.95              |
| DP205-08   | 744      | 0.029653                          | 0.001203                          | 0.282272                          | -17.7                        | -1.9                         | 1391                 | 2199                            | -0.96              |
| DP205-09   | 783      | 0.045326                          | 0.001837                          | 0.282219                          | -19.5                        | -3.2                         | 1491                 | 2347                            | -0.94              |
| DP205-10   | 796      | 0.02157                           | 0.00091                           | 0.2823                            | -16.7                        | 0.4                          | 1342                 | 2033                            | -0.97              |
| DP205-11   | 770      | 0.043279                          | 0.00158                           | 0.282241                          | -18.8                        | -2.6                         | 1450                 | 2283                            | -0.95              |
| DP205-12   | 778      | 0.062737                          | 0.002623                          | 0.2823                            | -17                          | -1                           | 1406                 | 2135                            | -0.92              |
| DP212-12   | 742      | 0.054361                          | 0.002337                          | 0.282321                          | -15.9                        | -0.7                         | 1363                 | 2096                            | -0.93              |
| DP212-01   | 757      | 0.029496                          | 0.001075                          | 0.282407                          | -12.9                        | 3.25                         | 1197.41              | 1750.21                         | -0.97              |
| DP212-02   | 763      | 0.050124                          | 0.001777                          | 0.282436                          | -11.89                       | 4.04                         | 1179.07              | 1683.75                         | -0.95              |

|          |     |          |          |          |        |       |         |         |       |
|----------|-----|----------|----------|----------|--------|-------|---------|---------|-------|
| DP212-03 | 764 | 0.030249 | 0.001231 | 0.282433 | -12    | 4.23  | 1166.3  | 1667.51 | -0.96 |
| DP212-04 | 754 | 0.044785 | 0.001718 | 0.282475 | -10.49 | 5.29  | 1120.47 | 1566.27 | -0.95 |
| DP212-05 | 757 | 0.04649  | 0.001752 | 0.282505 | -9.42  | 6.4   | 1078.38 | 1468.67 | -0.95 |
| DP212-06 | 745 | 0.052461 | 0.002081 | 0.282514 | -9.13  | 6.28  | 1075.8  | 1470.98 | -0.94 |
| DP212-07 | 747 | 0.078668 | 0.003004 | 0.282407 | -12.89 | 2.09  | 1261.38 | 1847.26 | -0.91 |
| DP212-08 | 754 | 0.039576 | 0.001508 | 0.28237  | -14.23 | 1.65  | 1264.35 | 1891.67 | -0.95 |
| DP212-09 | 756 | 0.025349 | 0.001041 | 0.282488 | -10.03 | 6.13  | 1082.21 | 1492.36 | -0.97 |
| DP212-10 | 761 | 0.038134 | 0.001547 | 0.282458 | -11.1  | 4.91  | 1139.86 | 1604.65 | -0.95 |
| DP212-11 | 768 | 0.041167 | 0.001554 | 0.282608 | -5.8   | 10.36 | 926.37  | 1120.59 | -0.95 |
| DP212-12 | 750 | 0.054131 | 0.001933 | 0.282558 | -7.57  | 8.02  | 1008.06 | 1318.64 | -0.94 |
| DP212-13 | 764 | 0.039653 | 0.00142  | 0.28243  | -12.09 | 4.05  | 1175.63 | 1683.76 | -0.96 |

$$\varepsilon_{\text{Hf}}(t) = 10000 \times (\{[(^{176}\text{Hf}/^{177}\text{Hf})_{\text{S}} - (^{176}\text{Lu}/^{177}\text{Hf})_{\text{S}} \times (e^{\lambda t} - 1)] / [(^{176}\text{Hf}/^{177}\text{Hf})_{\text{CHUR}, 0} - (^{176}\text{Lu}/^{177}\text{Hf})_{\text{CHUR}} \times (e^{\lambda t} - 1)] - 1\});$$

$$T_{\text{DM}} = 1/\lambda \times \ln \{1 + [(^{176}\text{Hf}/^{177}\text{Hf})_{\text{S}} - (^{176}\text{Hf}/^{177}\text{Hf})_{\text{DM}}] / [(^{176}\text{Hf}/^{177}\text{Hf})_{\text{S}} - (^{176}\text{Hf}/^{177}\text{Hf})_{\text{DM}}]\};$$

$$T_{\text{DM}}^{\text{C}} = T_{\text{DM}} - (T_{\text{DM}} - t) \times [(f_{\text{cc}} - f_{\text{S}}) / (f_{\text{cc}} - f_{\text{DM}})], \quad f_{\text{Lu}/\text{Hf}} = (^{176}\text{Lu}/^{177}\text{Hf})_{\text{S}} / (^{176}\text{Lu}/^{177}\text{Hf})_{\text{CHUR}} - 1.$$

$\lambda = 1.867 \times 10^{-11}/\text{a}$  [70];  $(^{176}\text{Lu}/^{177}\text{Hf})_{\text{S}}$  and  $(^{176}\text{Hf}/^{177}\text{Hf})_{\text{S}}$  are the measured values of samples;  $(^{176}\text{Lu}/^{177}\text{Hf})_{\text{CHUR}} = 0.0332$ ,  $(^{176}\text{Hf}/^{177}\text{Hf})_{\text{CHUR}, 0} = 0.282772$  [71];  $(^{176}\text{Lu}/^{177}\text{Hf})_{\text{DM}} = 0.0384$ ,  $(^{176}\text{Hf}/^{177}\text{Hf})_{\text{DM}} = 0.28325$  [40];  $(^{176}\text{Lu}/^{177}\text{Hf})_{\text{average crust}} = 0.015$ ;  $f_{\text{cc}} = [(^{176}\text{Lu}/^{177}\text{Hf})_{\text{average crust}} / (^{176}\text{Lu}/^{177}\text{Hf})_{\text{CHUR}}] - 1$ ;  $f_{\text{S}} = f_{\text{Lu}/\text{Hf}}$ ;  $f_{\text{DM}} = [(^{176}\text{Lu}/^{177}\text{Hf})_{\text{DM}} / (^{176}\text{Lu}/^{177}\text{Hf})_{\text{CHUR}}] - 1$ ;  $t$  is the crystallization age of zircon.
