# Supplementary material for: Geological Significance of Neoproterozoic Intrusive Rocks in the South Section of the Ailaoshan Orogenic Belt, SW China: Insights from Petrology, Geochemistry, and Geochronology
Source: MDPI journal article supplement (doi:10.3390/min13030349), 2023-03-01
Supplement: s1 [file s1]

Table S1 Major element (wt%), REE element (ppm), and trace element (ppm) compositions of magmatic rocks

| Sample No.                     | gabbro |       |       |       |        |        | syenogranite |        |        |        |        | monzogranite |        |        |        |
|--------------------------------|--------|-------|-------|-------|--------|--------|--------------|--------|--------|--------|--------|--------------|--------|--------|--------|
|                                | DP-26  | DP-31 | DP-49 | DP-72 | DP-141 | DP-200 | DP-201       | DP-202 | DP-203 | DP-204 | DP-206 | DP212        | DP-213 | DP-214 | DP-215 |
| SiO <sub>2</sub>               | 54.32  | 51.61 | 50.69 | 49.72 | 52.51  | 72.19  | 71.76        | 71.99  | 71.64  | 70.63  | 71.79  | 71.58        | 73.53  | 70.95  | 71.24  |
| Al <sub>2</sub> O <sub>3</sub> | 17.69  | 16.42 | 15.38 | 15.45 | 14.35  | 14.64  | 14.64        | 14.92  | 15.22  | 15.80  | 14.87  | 15.99        | 14.90  | 16.14  | 14.64  |
| Fe <sub>2</sub> O <sub>3</sub> | 1.59   | 1.84  | 3.12  | 0.85  | 1.57   | 1.02   | 1.12         | 0.80   | 1.38   | 1.55   | 0.97   | 0.81         | 0.65   | 0.82   | 0.86   |
| FeO                            | 3.96   | 6     | 6.91  | 6.39  | 6.44   | 1.05   | 1.00         | 0.97   | 0.74   | 0.98   | 0.99   | 0.47         | 0.61   | 0.64   | 0.74   |
| MnO                            | 0.08   | 0.12  | 0.18  | 0.11  | 0.12   | 0.04   | 0.05         | 0.03   | 0.04   | 0.05   | 0.05   | 0.03         | 0.06   | 0.03   | 0.04   |
| TiO <sub>2</sub>               | 0.56   | 0.35  | 1.33  | 0.2   | 0.44   | 0.20   | 0.21         | 0.20   | 0.19   | 0.25   | 0.18   | 0.20         | 0.15   | 0.21   | 0.22   |
| CaO                            | 9.22   | 6.18  | 7.71  | 7.68  | 8.73   | 1.08   | 1.84         | 1.13   | 0.53   | 0.71   | 0.98   | 0.42         | 0.53   | 0.35   | 1.37   |
| MgO                            | 5.89   | 9.79  | 7.13  | 13.45 | 10.11  | 0.59   | 0.53         | 0.68   | 0.52   | 0.73   | 0.55   | 0.45         | 0.34   | 0.46   | 0.57   |
| Na <sub>2</sub> O              | 3.59   | 2.18  | 2.55  | 1.99  | 2.7    | 3.94   | 6.00         | 5.44   | 3.89   | 5.15   | 3.69   | 4.27         | 3.91   | 4.24   | 4.01   |
| K <sub>2</sub> O               | 0.38   | 2.04  | 1.65  | 0.32  | 0.39   | 3.91   | 1.59         | 2.33   | 4.53   | 3.05   | 4.92   | 4.88         | 4.46   | 5.29   | 4.71   |
| P <sub>2</sub> O <sub>5</sub>  | 0.09   | 0.04  | 0.4   | 0.04  | 0.06   | 0.09   | 0.09         | 0.09   | 0.09   | 0.10   | 0.09   | 0.09         | 0.10   | 0.11   | 0.10   |
| LOI                            | 2.49   | 3.39  | 2.81  | 3.75  | 2.44   | 1.04   | 0.96         | 1.19   | 1.09   | 0.78   | 0.75   | 0.57         | 0.52   | 0.54   | 1.28   |
| Total                          | 99.88  | 99.95 | 99.85 | 99.92 | 99.86  | 99.80  | 99.79        | 99.75  | 99.83  | 99.77  | 99.84  | 99.76        | 99.77  | 99.78  | 99.79  |
| Q                              | 4.51   |       | 1.98  |       | 0.84   | 31.27  | 26.13        | 28.25  | 29.93  | 26.38  | 28.66  | 26.78        | 32.32  | 24.89  | 26.49  |
| An                             | 31.87  | 30.02 | 26.43 | 33.55 | 26.57  | 4.83   | 8.42         | 5.09   | 2.07   | 2.9    | 4.31   | 1.51         | 1.99   | 1.03   | 6.24   |
| Ab                             | 31.2   | 19.1  | 22.23 | 17.5  | 23.45  | 33.76  | 51.38        | 46.7   | 33.34  | 44.04  | 31.52  | 36.43        | 33.34  | 36.16  | 34.45  |
| Or                             | 2.31   | 12.48 | 10.05 | 1.97  | 2.37   | 23.4   | 9.51         | 13.97  | 27.12  | 18.21  | 29.35  | 29.08        | 26.56  | 31.5   | 28.26  |
| C                              | 11.64  | 1.17  | 8.32  | 4.63  | 14.07  | 2.21   |              | 1.63   | 3.21   | 3.01   | 1.93   | 3.16         | 2.94   | 3.09   | 0.7    |
| Hy                             | 14.81  | 32.44 | 22.78 | 31.99 | 29.37  | 2.57   | 2.4          | 2.61   | 2.35   | 3.09   | 2.34   | 1.56         | 1.48   | 1.63   | 2.09   |
| DI                             | 38.02  | 31.58 | 34.26 | 19.47 | 26.66  | 88.44  | 87.02        | 88.91  | 90.39  | 88.63  | 89.52  | 92.29        | 92.23  | 92.55  | 89.21  |
| SI                             | 38.22  | 44.81 | 33.38 | 58.48 | 47.67  | 5.62   | 5.19         | 6.65   | 4.72   | 6.39   | 4.95   | 4.14         | 3.41   | 4.02   | 5.24   |
| σ43                            | 1.3    | 1.83  | 2.03  | 0.66  | 0.92   | 2.1    | 1.99         | 2.07   | 2.46   | 2.42   | 2.56   | 2.92         | 2.29   | 3.24   | 2.67   |
| La                             | 6.87   | 4.08  | 12.89 | 3.26  | 4.40   | 27.75  | 32.51        | 30.52  | 31.04  | 33.45  | 23.43  | 32.77        | 24.06  | 37.86  | 38.66  |
| Ce                             | 14.41  | 8.49  | 26.03 | 6.35  | 9.47   | 61.65  | 68.33        | 67.47  | 59.26  | 59.95  | 51.84  | 61.87        | 54.62  | 74.29  | 74.18  |
| Pr                             | 2.00   | 1.19  | 3.47  | 0.85  | 1.39   | 5.41   | 5.82         | 5.83   | 6.08   | 6.45   | 4.62   | 7.51         | 5.21   | 8.81   | 8.75   |
| Nd                             | 8.71   | 5.53  | 15.5  | 3.66  | 6.61   | 17.93  | 18.52        | 19.03  | 20.28  | 21.07  | 15.21  | 26.26        | 18.30  | 31.27  | 30.98  |
| Sm                             | 2.16   | 1.28  | 3.32  | 0.82  | 1.72   | 3.16   | 2.79         | 3.23   | 3.30   | 3.58   | 2.72   | 4.84         | 3.65   | 5.87   | 5.73   |
| Eu                             | 1.01   | 0.66  | 1.61  | 0.47  | 0.83   | 0.51   | 0.84         | 0.62   | 0.58   | 0.61   | 0.55   | 0.89         | 0.58   | 0.93   | 0.99   |

|                      |       |       |       |       |       |        |        |        |        |        |        |        |        |        |        |
|----------------------|-------|-------|-------|-------|-------|--------|--------|--------|--------|--------|--------|--------|--------|--------|--------|
| Gd                   | 2.13  | 1.32  | 3.4   | 0.83  | 1.77  | 2.77   | 2.18   | 2.83   | 2.63   | 3.35   | 2.43   | 3.94   | 3.26   | 5.18   | 4.81   |
| Tb                   | 0.34  | 0.21  | 0.52  | 0.14  | 0.29  | 0.51   | 0.35   | 0.51   | 0.43   | 0.64   | 0.44   | 0.71   | 0.61   | 1.00   | 0.83   |
| Dy                   | 2.08  | 1.28  | 3.13  | 0.84  | 1.75  | 3.15   | 1.93   | 3.06   | 2.41   | 4.17   | 2.63   | 4.10   | 3.60   | 6.13   | 4.66   |
| Ho                   | 0.38  | 0.23  | 0.57  | 0.15  | 0.31  | 0.66   | 0.40   | 0.64   | 0.48   | 0.90   | 0.54   | 0.78   | 0.67   | 1.22   | 0.86   |
| Er                   | 1.07  | 0.66  | 1.66  | 0.45  | 0.87  | 1.99   | 1.16   | 1.87   | 1.39   | 2.78   | 1.56   | 2.17   | 1.84   | 3.45   | 2.31   |
| Tm                   | 0.15  | 0.09  | 0.24  | 0.07  | 0.12  | 0.35   | 0.19   | 0.31   | 0.22   | 0.52   | 0.25   | 0.34   | 0.29   | 0.54   | 0.35   |
| Yb                   | 0.96  | 0.56  | 1.4   | 0.41  | 0.74  | 2.45   | 1.25   | 2.03   | 1.45   | 3.83   | 1.66   | 2.21   | 1.90   | 3.32   | 2.19   |
| Lu                   | 0.13  | 0.08  | 0.21  | 0.06  | 0.1   | 0.35   | 0.19   | 0.28   | 0.21   | 0.59   | 0.24   | 0.28   | 0.26   | 0.42   | 0.32   |
| Y                    | 9.78  | 5.87  | 14.97 | 4.03  | 8.03  | 19.77  | 11.56  | 18.71  | 14.92  | 27.21  | 15.47  | 21.25  | 19.90  | 34.34  | 23.48  |
| ΣREE                 | 42.4  | 25.66 | 73.95 | 18.36 | 30.37 | 128.64 | 136.46 | 138.23 | 129.76 | 141.89 | 108.12 | 148.67 | 118.85 | 180.29 | 175.62 |
| LREE                 | 35.16 | 21.23 | 62.82 | 15.41 | 24.42 | 116.41 | 128.81 | 126.70 | 120.54 | 125.11 | 98.37  | 134.14 | 106.42 | 159.03 | 159.29 |
| HREE                 | 7.24  | 4.43  | 11.13 | 2.95  | 5.95  | 12.23  | 7.65   | 11.53  | 9.22   | 16.78  | 9.75   | 14.53  | 12.43  | 21.26  | 16.33  |
| LREE/HREE            | 4.86  | 4.79  | 5.64  | 5.23  | 4.1   | 9.52   | 16.84  | 10.99  | 13.07  | 7.46   | 10.09  | 9.23   | 8.56   | 7.48   | 9.75   |
| (La/Yb) <sub>N</sub> | 5.13  | 5.23  | 6.6   | 5.7   | 4.27  | 8.12   | 18.66  | 10.78  | 15.36  | 6.26   | 10.12  | 10.64  | 9.08   | 8.18   | 12.66  |
| δEu                  | 1.42  | 1.54  | 1.45  | 1.72  | 1.44  | 0.53   | 1.04   | 0.63   | 0.60   | 0.54   | 0.65   | 0.62   | 0.51   | 0.52   | 0.58   |
| δCe                  | 0.94  | 0.93  | 0.94  | 0.91  | 0.93  | 1.23   | 1.22   | 1.24   | 1.06   | 1.00   | 1.22   | 0.97   | 1.20   | 1.00   | 0.99   |
| Ba                   | 148.6 | 775.3 | 660.9 | 116.5 | 119.6 | 532.10 | 342.80 | 480.60 | 593.40 | 419.30 | 591.10 | 608.70 | 483.80 | 649.80 | 615.00 |
| Hf                   | 2.23  | 1.08  | 2.03  | 1.05  | 1.36  | 7.06   | 6.42   | 6.23   | 5.86   | 8.38   | 6.88   | 7.91   | 4.18   | 7.03   | 6.27   |
| Nb                   | 1.76  | 0.71  | 2.2   | 0.42  | 0.81  | 14.28  | 8.51   | 11.74  | 10.67  | 16.03  | 12.98  | 14.81  | 18.02  | 16.49  | 11.66  |
| Rb                   | 8.5   | 61.9  | 41.6  | 9.8   | 8.4   | 146.49 | 57.76  | 91.26  | 106.19 | 154.59 | 157.74 | 160.34 | 186.12 | 171.06 | 132.03 |
| Sr                   | 792.7 | 377.5 | 450.9 | 571.9 | 546.5 | 161.80 | 283.10 | 190.50 | 168.10 | 188.40 | 145.60 | 118.40 | 90.40  | 108.70 | 106.30 |
| Ta                   | 0.13  | 0.05  | 0.18  | 0.05  | 0.07  | 1.82   | 0.75   | 1.19   | 0.89   | 2.41   | 1.20   | 1.60   | 2.68   | 1.58   | 1.11   |
| Th                   | 0.47  | 0.32  | 0.68  | 0.25  | 0.31  | 19.47  | 15.14  | 23.07  | 28.17  | 30.88  | 21.89  | 14.60  | 12.97  | 16.73  | 15.72  |
| U                    | 0.3   | 0.17  | 0.13  | 0.05  | 0.19  | 5.92   | 2.46   | 5.71   | 7.61   | 7.38   | 5.03   | 2.48   | 2.20   | 3.01   | 2.58   |
| Zr                   | 44    | 27.1  | 40.4  | 28    | 33.3  | 145.70 | 119.50 | 124.90 | 137.60 | 167.00 | 131.80 | 211.10 | 95.20  | 173.30 | 182.50 |
