# Supplementary material for: Geological Significance of Neoproterozoic Intrusive Rocks in the South Section of the Ailaoshan Orogenic Belt, SW China: Insights from Petrology, Geochemistry, and Geochronology
Source: MDPI journal article supplement (doi:10.3390/min13030349), 2023-03-01
Supplement: s1 [file s1]

Table S2 LA-ICP-MS zircon U-Pb data of magmatic rocks

| Sample No. | Element content (ppm) |        |        | Th/U | Element ratios                       |         |                                     |         |                                     |        | Age (Ma)                             |    |                                     |    |                                     |    |
|------------|-----------------------|--------|--------|------|--------------------------------------|---------|-------------------------------------|---------|-------------------------------------|--------|--------------------------------------|----|-------------------------------------|----|-------------------------------------|----|
|            | Pb                    | Th     | U      |      | <sup>207</sup> Pb/ <sup>206</sup> Pb | 1σ      | <sup>207</sup> Pb/ <sup>235</sup> U | 1σ      | <sup>206</sup> Pb/ <sup>238</sup> U | 1σ     | <sup>207</sup> Pb/ <sup>206</sup> Pb | 1σ | <sup>207</sup> Pb/ <sup>235</sup> U | 1σ | <sup>206</sup> Pb/ <sup>238</sup> U | 1σ |
| DP141-01   | 49                    | 144.48 | 359    | 0.4  | 0.0666                               | 0.0009  | 1.2368                              | 0.0186  | 0.1347                              | 0.0013 | 824                                  | 27 | 817                                 | 12 | 815                                 | 8  |
| DP141-02   | 50                    | 237.67 | 345    | 0.69 | 0.0663                               | 0.0008  | 1.2271                              | 0.0182  | 0.1343                              | 0.0016 | 814                                  | 24 | 813                                 | 12 | 812                                 | 10 |
| DP141-03   | 23                    | 76.32  | 165    | 0.46 | 0.0667                               | 0.0009  | 1.2369                              | 0.0188  | 0.1346                              | 0.0014 | 827                                  | 29 | 817                                 | 12 | 814                                 | 8  |
| DP141-04   | 37                    | 220.91 | 248    | 0.89 | 0.0663                               | 0.0008  | 1.2358                              | 0.0175  | 0.1352                              | 0.0015 | 816                                  | 25 | 817                                 | 12 | 817                                 | 9  |
| DP141-05   | 35                    | 124.88 | 255    | 0.49 | 0.0661                               | 0.0008  | 1.2282                              | 0.0183  | 0.1347                              | 0.0017 | 810                                  | 26 | 814                                 | 12 | 815                                 | 10 |
| DP141-06   | 28                    | 74.29  | 203    | 0.37 | 0.0664                               | 0.0009  | 1.2415                              | 0.0201  | 0.1356                              | 0.0018 | 820                                  | 28 | 820                                 | 13 | 820                                 | 11 |
| DP141-07   | 21                    | 38.94  | 161    | 0.24 | 0.0664                               | 0.0012  | 1.2383                              | 0.025   | 0.1352                              | 0.0019 | 820                                  | 37 | 818                                 | 16 | 817                                 | 12 |
| DP141-08   | 25                    | 48.63  | 184    | 0.27 | 0.0668                               | 0.0011  | 1.2392                              | 0.0217  | 0.1346                              | 0.0016 | 831                                  | 36 | 819                                 | 14 | 814                                 | 10 |
| DP141-09   | 49                    | 125.88 | 357    | 0.35 | 0.0662                               | 0.001   | 1.2365                              | 0.0183  | 0.1354                              | 0.0017 | 813                                  | 30 | 817                                 | 12 | 819                                 | 10 |
| DP141-10   | 30                    | 62.39  | 220    | 0.28 | 0.0664                               | 0.0017  | 1.2376                              | 0.0285  | 0.1351                              | 0.0017 | 820                                  | 53 | 818                                 | 19 | 817                                 | 10 |
| DP141-11   | 22                    | 39.8   | 164    | 0.24 | 0.0662                               | 0.0018  | 1.2334                              | 0.0391  | 0.1351                              | 0.0019 | 814                                  | 57 | 816                                 | 26 | 817                                 | 11 |
| DP141-12   | 19                    | 32.28  | 138    | 0.23 | 0.0662                               | 0.0014  | 1.2313                              | 0.0317  | 0.1348                              | 0.0017 | 814                                  | 45 | 815                                 | 21 | 815                                 | 10 |
| DP141-13   | 63                    | 72.22  | 465    | 0.16 | 0.0664                               | 0.0009  | 1.2441                              | 0.0187  | 0.136                               | 0.0016 | 818                                  | 27 | 821                                 | 12 | 822                                 | 9  |
| DP141-14   | 31                    | 58.16  | 225    | 0.26 | 0.0661                               | 0.0009  | 1.232                               | 0.0178  | 0.1352                              | 0.0016 | 810                                  | 29 | 815                                 | 12 | 817                                 | 10 |
| DP141-15   | 30                    | 62.57  | 219    | 0.29 | 0.0663                               | 0.0009  | 1.239                               | 0.0186  | 0.1356                              | 0.0015 | 815                                  | 29 | 818                                 | 12 | 820                                 | 9  |
| DP141-17   | 37                    | 126.14 | 250    | 0.5  | 0.0667                               | 0.001   | 1.2375                              | 0.019   | 0.1345                              | 0.0013 | 829                                  | 30 | 818                                 | 13 | 814                                 | 8  |
| DP141-18   | 37                    | 87.94  | 258    | 0.34 | 0.0666                               | 0.001   | 1.2371                              | 0.019   | 0.1348                              | 0.0014 | 825                                  | 30 | 818                                 | 13 | 815                                 | 8  |
| DP141-19   | 18                    | 28.68  | 93     | 0.31 | 0.0918                               | 0.0019  | 2.2039                              | 0.0511  | 0.1741                              | 0.0018 | 1464                                 | 40 | 1182                                | 27 | 1034                                | 10 |
| DP141-20   | 34                    | 100.87 | 227    | 0.44 | 0.0662                               | 0.0008  | 1.2346                              | 0.0166  | 0.1352                              | 0.0014 | 813                                  | 25 | 816                                 | 11 | 818                                 | 9  |
| DP141-21   | 36                    | 90.77  | 251    | 0.36 | 0.0664                               | 0.0013  | 1.2245                              | 0.0253  | 0.1337                              | 0.0013 | 819                                  | 42 | 812                                 | 17 | 809                                 | 8  |
| DP141-22   | 27                    | 52.67  | 163    | 0.32 | 0.0921                               | 0.0015  | 1.852                               | 0.0333  | 0.1458                              | 0.0015 | 1470                                 | 31 | 1064                                | 19 | 877                                 | 9  |
| DP141-23   | 17                    | 36.37  | 78     | 0.47 | 0.1118                               | 0.0019  | 2.7653                              | 0.0499  | 0.1793                              | 0.0018 | 1829                                 | 31 | 1346                                | 24 | 1063                                | 10 |
| DP141-24   | 50                    | 59.85  | 288    | 0.21 | 0.0968                               | 0.0014  | 2.0592                              | 0.0366  | 0.1543                              | 0.0018 | 1563                                 | 27 | 1135                                | 20 | 925                                 | 11 |
| DP141-25   | 36                    | 60.54  | 244    | 0.25 | 0.0666                               | 0.001   | 1.245                               | 0.0191  | 0.1356                              | 0.0014 | 825                                  | 30 | 821                                 | 13 | 820                                 | 8  |
| DP205-01   | 258.31                | 129.73 | 442.29 | 0.29 | 0.06463                              | 0.00102 | 1.15664                             | 0.01744 | 0.1298                              | 0.0013 | 762                                  | 16 | 780                                 | 8  | 787                                 | 7  |
| DP205-02   | 227.97                | 204.24 | 372.89 | 0.55 | 0.06531                              | 0.00104 | 1.17773                             | 0.01793 | 0.1308                              | 0.0013 | 784                                  | 16 | 790                                 | 8  | 793                                 | 8  |
| DP205-03   | 239.2                 | 218.37 | 489.28 | 0.45 | 0.06779                              | 0.00123 | 0.99478                             | 0.01715 | 0.1065                              | 0.0011 | 862                                  | 19 | 701                                 | 9  | 652                                 | 7  |
| DP205-04   | 321.08                | 224.01 | 545.41 | 0.41 | 0.06438                              | 0.00096 | 1.14791                             | 0.01629 | 0.1294                              | 0.0013 | 754                                  | 15 | 776                                 | 8  | 784                                 | 7  |
| DP205-05   | 265.82                | 179.07 | 475.8  | 0.38 | 0.06771                              | 0.00108 | 1.14262                             | 0.01734 | 0.1224                              | 0.0012 | 860                                  | 16 | 774                                 | 8  | 744                                 | 7  |

|          |        |        |         |      |         |         |         |         |        |        |     |    |     |    |     |   |
|----------|--------|--------|---------|------|---------|---------|---------|---------|--------|--------|-----|----|-----|----|-----|---|
| DP205-06 | 313.48 | 198.7  | 555.78  | 0.36 | 0.06564 | 0.00099 | 1.12339 | 0.01614 | 0.1242 | 0.0012 | 795 | 15 | 765 | 8  | 754 | 7 |
| DP205-08 | 355.5  | 287.47 | 635.49  | 0.45 | 0.0682  | 0.00103 | 1.14016 | 0.01627 | 0.1213 | 0.0012 | 875 | 15 | 773 | 8  | 738 | 7 |
| DP205-09 | 391.14 | 318.31 | 725.34  | 0.44 | 0.06494 | 0.00096 | 1.05409 | 0.01467 | 0.1178 | 0.0012 | 772 | 14 | 731 | 7  | 718 | 7 |
| DP205-10 | 891.35 | 870.7  | 1617.77 | 0.54 | 0.06456 | 0.00095 | 1.06191 | 0.01472 | 0.1193 | 0.0012 | 760 | 14 | 735 | 7  | 727 | 7 |
| DP205-11 | 260.62 | 234.66 | 453.1   | 0.52 | 0.06735 | 0.00127 | 1.13538 | 0.02054 | 0.1223 | 0.0013 | 849 | 21 | 770 | 10 | 744 | 8 |
| DP205-12 | 310.62 | 253.12 | 617.93  | 0.41 | 0.06624 | 0.001   | 0.99961 | 0.01427 | 0.1095 | 0.0011 | 814 | 15 | 704 | 7  | 670 | 6 |
| DP205-14 | 190.19 | 151.28 | 318.31  | 0.48 | 0.06552 | 0.00109 | 1.16658 | 0.01856 | 0.1292 | 0.0013 | 791 | 17 | 785 | 9  | 783 | 8 |
| DP205-15 | 311.75 | 258.44 | 587.61  | 0.44 | 0.06879 | 0.00104 | 1.09585 | 0.01562 | 0.1156 | 0.0012 | 892 | 14 | 751 | 8  | 705 | 7 |
| DP205-16 | 413.69 | 506.75 | 803.68  | 0.63 | 0.06542 | 0.00095 | 0.99633 | 0.01372 | 0.1105 | 0.0011 | 788 | 14 | 702 | 7  | 675 | 6 |
| DP205-17 | 234.29 | 153.23 | 449.91  | 0.34 | 0.06819 | 0.00108 | 1.0724  | 0.01613 | 0.1141 | 0.0012 | 874 | 16 | 740 | 8  | 696 | 7 |
| DP205-18 | 148.56 | 121.59 | 241.29  | 0.5  | 0.06376 | 0.00116 | 1.15483 | 0.02007 | 0.1314 | 0.0014 | 734 | 20 | 780 | 9  | 796 | 8 |
| DP205-19 | 265.88 | 297.15 | 567.32  | 0.52 | 0.06563 | 0.00105 | 0.91278 | 0.01386 | 0.1009 | 0.001  | 795 | 16 | 659 | 7  | 620 | 6 |
| DP205-20 | 220.65 | 192.03 | 374.04  | 0.51 | 0.06474 | 0.00106 | 1.13259 | 0.0176  | 0.1269 | 0.0013 | 766 | 17 | 769 | 8  | 770 | 7 |
| DP205-21 | 212.64 | 146.86 | 361.38  | 0.41 | 0.06459 | 0.00106 | 1.14157 | 0.0178  | 0.1282 | 0.0013 | 761 | 17 | 773 | 8  | 778 | 7 |
| DP205-23 | 317.57 | 199.03 | 565.15  | 0.35 | 0.06891 | 0.00104 | 1.16718 | 0.01666 | 0.1229 | 0.0012 | 896 | 15 | 785 | 8  | 747 | 7 |
| DP212-01 | 67.55  | 104.29 | 105.45  | 0.99 | 0.06762 | 0.0017  | 1.16193 | 0.0278  | 0.1246 | 0.0015 | 857 | 30 | 783 | 13 | 757 | 9 |
| DP212-02 | 114.81 | 200.3  | 179.65  | 1.11 | 0.06674 | 0.0014  | 1.15639 | 0.0228  | 0.1257 | 0.0014 | 830 | 23 | 780 | 11 | 763 | 8 |
| DP212-03 | 102.71 | 145.87 | 170.46  | 0.86 | 0.06667 | 0.0014  | 1.10658 | 0.0226  | 0.1204 | 0.0013 | 827 | 25 | 757 | 11 | 733 | 8 |
| DP212-04 | 90.88  | 102.72 | 148.96  | 0.69 | 0.06331 | 0.0014  | 1.10418 | 0.0236  | 0.1265 | 0.0014 | 719 | 27 | 755 | 11 | 768 | 8 |
| DP212-05 | 79.58  | 96.52  | 128.55  | 0.75 | 0.06467 | 0.0015  | 1.12151 | 0.0255  | 0.1258 | 0.0014 | 764 | 29 | 764 | 12 | 764 | 8 |
| DP212-06 | 77.97  | 138.86 | 122.49  | 1.13 | 0.06579 | 0.0016  | 1.12569 | 0.0257  | 0.1241 | 0.0014 | 800 | 29 | 766 | 12 | 754 | 8 |
| DP212-07 | 48.72  | 95.9   | 71.18   | 1.35 | 0.06406 | 0.002   | 1.11611 | 0.0341  | 0.1264 | 0.0016 | 744 | 43 | 761 | 16 | 767 | 9 |
| DP212-08 | 92.35  | 157.09 | 145.89  | 1.08 | 0.06627 | 0.0015  | 1.13836 | 0.0242  | 0.1246 | 0.0014 | 815 | 26 | 772 | 11 | 757 | 8 |
| DP212-09 | 86.97  | 170.61 | 136.76  | 1.25 | 0.06439 | 0.0015  | 1.08806 | 0.0242  | 0.1226 | 0.0014 | 754 | 28 | 748 | 12 | 745 | 8 |
| DP212-10 | 135.56 | 239.86 | 226.4   | 1.06 | 0.06695 | 0.0013  | 1.09923 | 0.0201  | 0.1191 | 0.0013 | 836 | 21 | 753 | 10 | 725 | 7 |
| DP212-11 | 84.78  | 154.97 | 133.16  | 1.16 | 0.06642 | 0.0015  | 1.12518 | 0.0248  | 0.1229 | 0.0014 | 820 | 27 | 765 | 12 | 747 | 8 |
| DP212-12 | 73.32  | 99.78  | 117.91  | 0.85 | 0.06463 | 0.0016  | 1.10615 | 0.0261  | 0.1241 | 0.0015 | 762 | 30 | 756 | 13 | 754 | 8 |
| DP212-13 | 100.74 | 150.15 | 169.96  | 0.88 | 0.06506 | 0.0014  | 1.07509 | 0.0221  | 0.1199 | 0.0013 | 776 | 25 | 741 | 11 | 730 | 8 |
| DP212-14 | 67.68  | 93.72  | 107.79  | 0.87 | 0.06508 | 0.0016  | 1.11601 | 0.0271  | 0.1244 | 0.0015 | 777 | 31 | 761 | 13 | 756 | 8 |
| DP212-15 | 165.86 | 325.15 | 259.24  | 1.25 | 0.06466 | 0.0012  | 1.1177  | 0.02    | 0.1254 | 0.0013 | 763 | 21 | 762 | 10 | 761 | 8 |
| DP212-16 | 56.38  | 67.8   | 88.86   | 0.76 | 0.06525 | 0.0018  | 1.14192 | 0.0302  | 0.1269 | 0.0016 | 782 | 35 | 773 | 14 | 770 | 9 |
| DP212-17 | 77.66  | 88.71  | 123.51  | 0.72 | 0.06675 | 0.0016  | 1.17815 | 0.0269  | 0.128  | 0.0015 | 830 | 29 | 790 | 13 | 776 | 8 |
| DP212-18 | 100.33 | 157.26 | 165.04  | 0.95 | 0.06517 | 0.0015  | 1.0935  | 0.0234  | 0.1217 | 0.0014 | 780 | 26 | 750 | 11 | 740 | 8 |

|          |        |        |        |      |         |        |         |        |        |        |     |    |     |    |     |    |
|----------|--------|--------|--------|------|---------|--------|---------|--------|--------|--------|-----|----|-----|----|-----|----|
| DP212-19 | 98.41  | 109.02 | 159.54 | 0.68 | 0.06341 | 0.0014 | 1.11231 | 0.0235 | 0.1272 | 0.0014 | 722 | 26 | 759 | 11 | 772 | 8  |
| DP212-20 | 43.66  | 54.25  | 65.84  | 0.82 | 0.06688 | 0.0021 | 1.16674 | 0.0362 | 0.1265 | 0.0017 | 834 | 43 | 785 | 17 | 768 | 10 |
| DP212-22 | 80.42  | 153.34 | 122.96 | 1.25 | 0.06796 | 0.0016 | 1.17269 | 0.0273 | 0.1251 | 0.0015 | 867 | 29 | 788 | 13 | 760 | 8  |
| DP212-23 | 88.45  | 157.32 | 139.31 | 1.13 | 0.06423 | 0.0015 | 1.09279 | 0.0246 | 0.1234 | 0.0014 | 749 | 29 | 750 | 12 | 750 | 8  |
| DP212-24 | 111.81 | 121.99 | 184.51 | 0.66 | 0.06439 | 0.0014 | 1.11785 | 0.0227 | 0.1259 | 0.0014 | 754 | 25 | 762 | 11 | 764 | 8  |

---
